# Supplementary material for: Rapid and Accurate Approach for Honeybee Pollen Analysis Using ED-XRF and FTIR Spectroscopy
Source: MDPI journal article supplement (doi:10.3390/molecules26196024), 2021-10-04
Supplement: s1 [file s1]

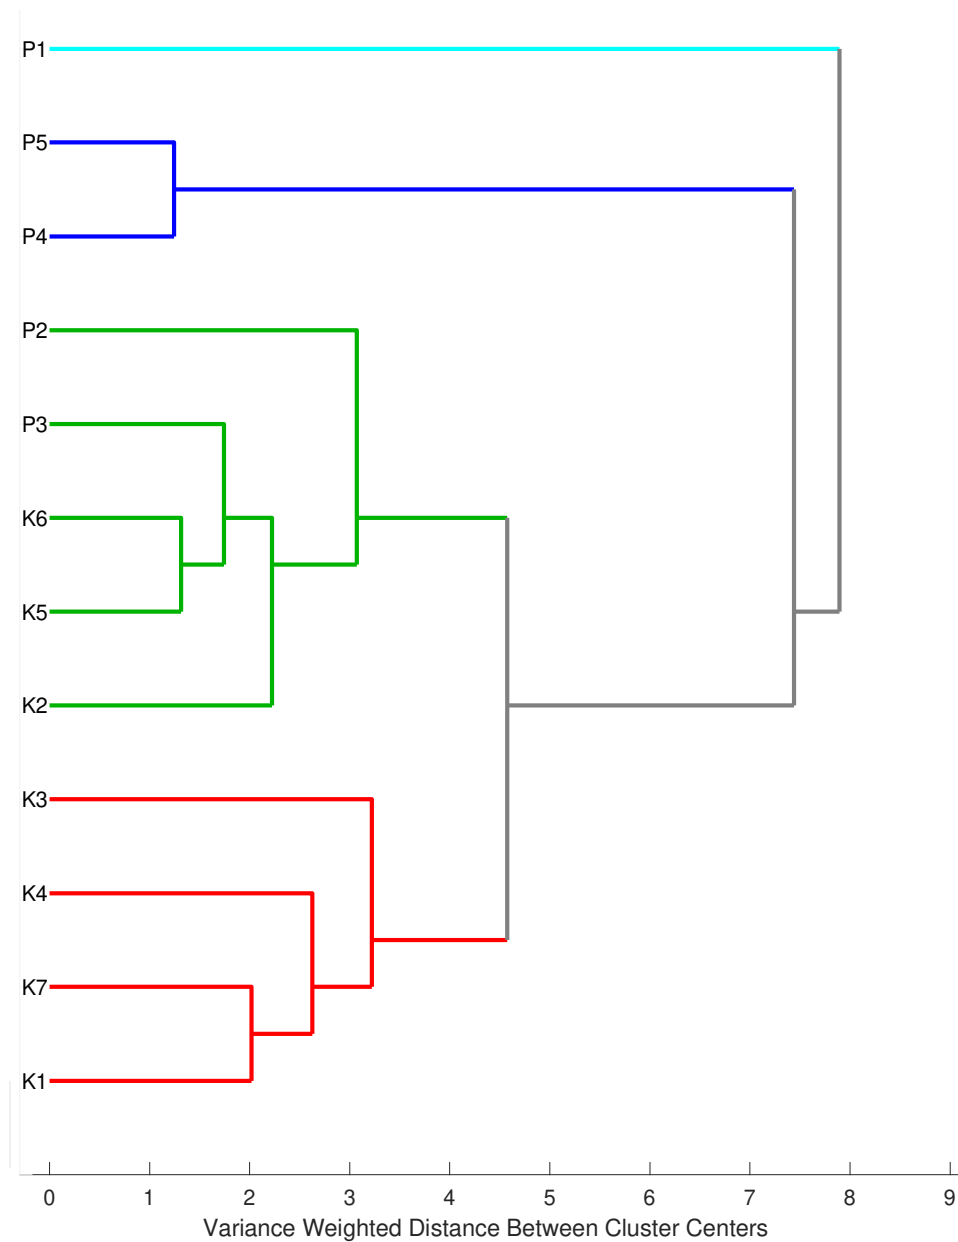

Figure S2. Dendrogram obtained by cluster analysis performed on the data from the ED-XRF analysis for bee pollen samples K1 – K7 and P1 – P5.
