# Supplementary material for: Rapid and Accurate Approach for Honeybee Pollen Analysis Using ED-XRF and FTIR Spectroscopy
Source: MDPI journal article supplement (doi:10.3390/molecules26196024), 2021-10-04
Supplement: s1 [file s1]

Table S6.

The comparison of the mineral concentrations in the bee pollen samples collected in different date and commercially available samples. The results were obtained using ED-XRF Fundamental Parameter method with standard sample.

| <b>Sample<br/>Mineral</b> | <b>K1 (mean<br/>+ SD)<br/>[mg/kg]</b> | <b>K2 (mean<br/>+ SD)<br/>[mg/kg]</b> | <b>K3 (mean<br/>+ SD)<br/>[mg/kg]</b> | <b>K4 (mean<br/>+ SD)<br/>[mg/kg]</b> | <b>K5 (mean<br/>+ SD)<br/>[mg/kg]</b> | <b>K6 (mean<br/>+ SD)<br/>[mg/kg]</b> | <b>K7 (mean<br/>+ SD)<br/>[mg/kg]</b> | <b>P1 (mean<br/>+ SD)<br/>[mg/kg]</b> | <b>P2 (mean<br/>+ SD)<br/>[mg/kg]</b> | <b>P3 (mean<br/>+ SD)<br/>[mg/kg]</b> | <b>P4 (mean<br/>+ SD)<br/>[mg/kg]</b> | <b>P5 (mean<br/>+ SD)<br/>[mg/kg]</b> |
|---------------------------|---------------------------------------|---------------------------------------|---------------------------------------|---------------------------------------|---------------------------------------|---------------------------------------|---------------------------------------|---------------------------------------|---------------------------------------|---------------------------------------|---------------------------------------|---------------------------------------|
| <b>Manganese</b>          | 25.6 ± 0.2                            | 37.6 ± 12.3                           | 22.6 ± 1.8                            | 31.2 ± 1.0                            | 18.9 ± 0.6                            | 17.6 ± 0.6                            | 40.1 ± 9.4                            | 13.9 ± 1.4                            | 53.3 ± 11.8                           | 23.4 ± 2.2                            | 20.5 ± 2.4                            | 17.0 ± 0.7                            |
| <b>Copper</b>             | 6.6 ± 0.8                             | 5.6 ± 0.2                             | 5.0 ± 0.1                             | 5.4 ± 0.5                             | 5.6 ± 0.4                             | 5.3 ± 0.2                             | 5.7 ± 0.6                             | 4.3 ± 0.2                             | 4.6 ± 0.2                             | 4.9 ± 0.2                             | 4.7 ± 0.2                             | 4.2 ± 0.4                             |
| <b>Zinc</b>               | 43.4 ± 4.2                            | 35.9 ± 1.4                            | 31.1 ± 2.6                            | 32.7 ± 0.8                            | 30.0 ± 0.8                            | 33.3 ± 0.9                            | 35.2 ± 2.7                            | 20.9 ± 2.8                            | 26.6 ± 0.2                            | 32.6 ± 2.4                            | 37.9 ± 1.8                            | 39.0 ± 1.9                            |
| <b>Potassium</b>          | 5254.4 ± 645.6                        | 4804.6 ± 254.2                        | 5847.1 ± 571.5                        | 7084.8 ± 413.9                        | 4859.4 ± 316.2                        | 4003.1 ± 229.6                        | 5409.6 ± 137.0                        | 3125.7 ± 165.9                        | 4611.6 ± 379.6                        | 4396.0 ± 167.9                        | 4087.7 ± 197.0                        | 4600.7 ± 71.6                         |
| <b>Calcium</b>            | 1402.9 ± 95.6                         | 1144.1 ± 119.3                        | 1858.0 ± 144.7                        | 1339.3 ± 93.1                         | 1345.4 ± 105.0                        | 1359.8 ± 134.6                        | 1444.6 ± 54.9                         | 1569.1 ± 111.1                        | 1376.5 ± 143.8                        | 1068.6 ± 82.8                         | 687.9 ± 76.6                          | 697.9 ± 24.1                          |
| <b>Iron</b>               | 93.1 ± 7.9                            | 67.1 ± 7.6                            | 67.7 ± 1.9                            | 125.8 ± 7.3                           | 83.4 ± 2.9                            | 81.9 ± 14.7                           | 87.4 ± 6.4                            | 160.3 ± 6.4                           | 63.9 ± 2.2                            | 69.0 ± 2.8                            | 70.1 ± 2.2                            | 67.2 ± 8.2                            |
| <b>Phosphorus</b>         | 5009.4 ± 542.2                        | 4248.7 ± 394.8                        | 6131.9 ± 549.5                        | 5415.5 ± 196.2                        | 3965.3 ± 244.2                        | 3709.2 ± 160.3                        | 5360.1 ± 100.5                        | 2281.2 ± 140.0                        | 4482.5 ± 490.5                        | 4320.9 ± 207.2                        | 3928.8 ± 191.8                        | 3475.5 ± 124.4                        |
| <b>Sulfur</b>             | 2589.5 ± 206.4                        | 2234.7 ± 204.9                        | 3208.2 ± 252.0                        | 2563.7 ± 124.3                        | 2058.0 ± 25.4                         | 2275.6 ± 75.0                         | 2882.3 ± 161.6                        | 1409.5 ± 174.2                        | 2547.7 ± 385.7                        | 2225.5 ± 94.4                         | 2095.2 ± 88.0                         | 1907.5 ± 44.3                         |
