# Supplementary material for: Rapid and Accurate Approach for Honeybee Pollen Analysis Using ED-XRF and FTIR Spectroscopy
Source: MDPI journal article supplement (doi:10.3390/molecules26196024), 2021-10-04
Supplement: s1 [file s1]

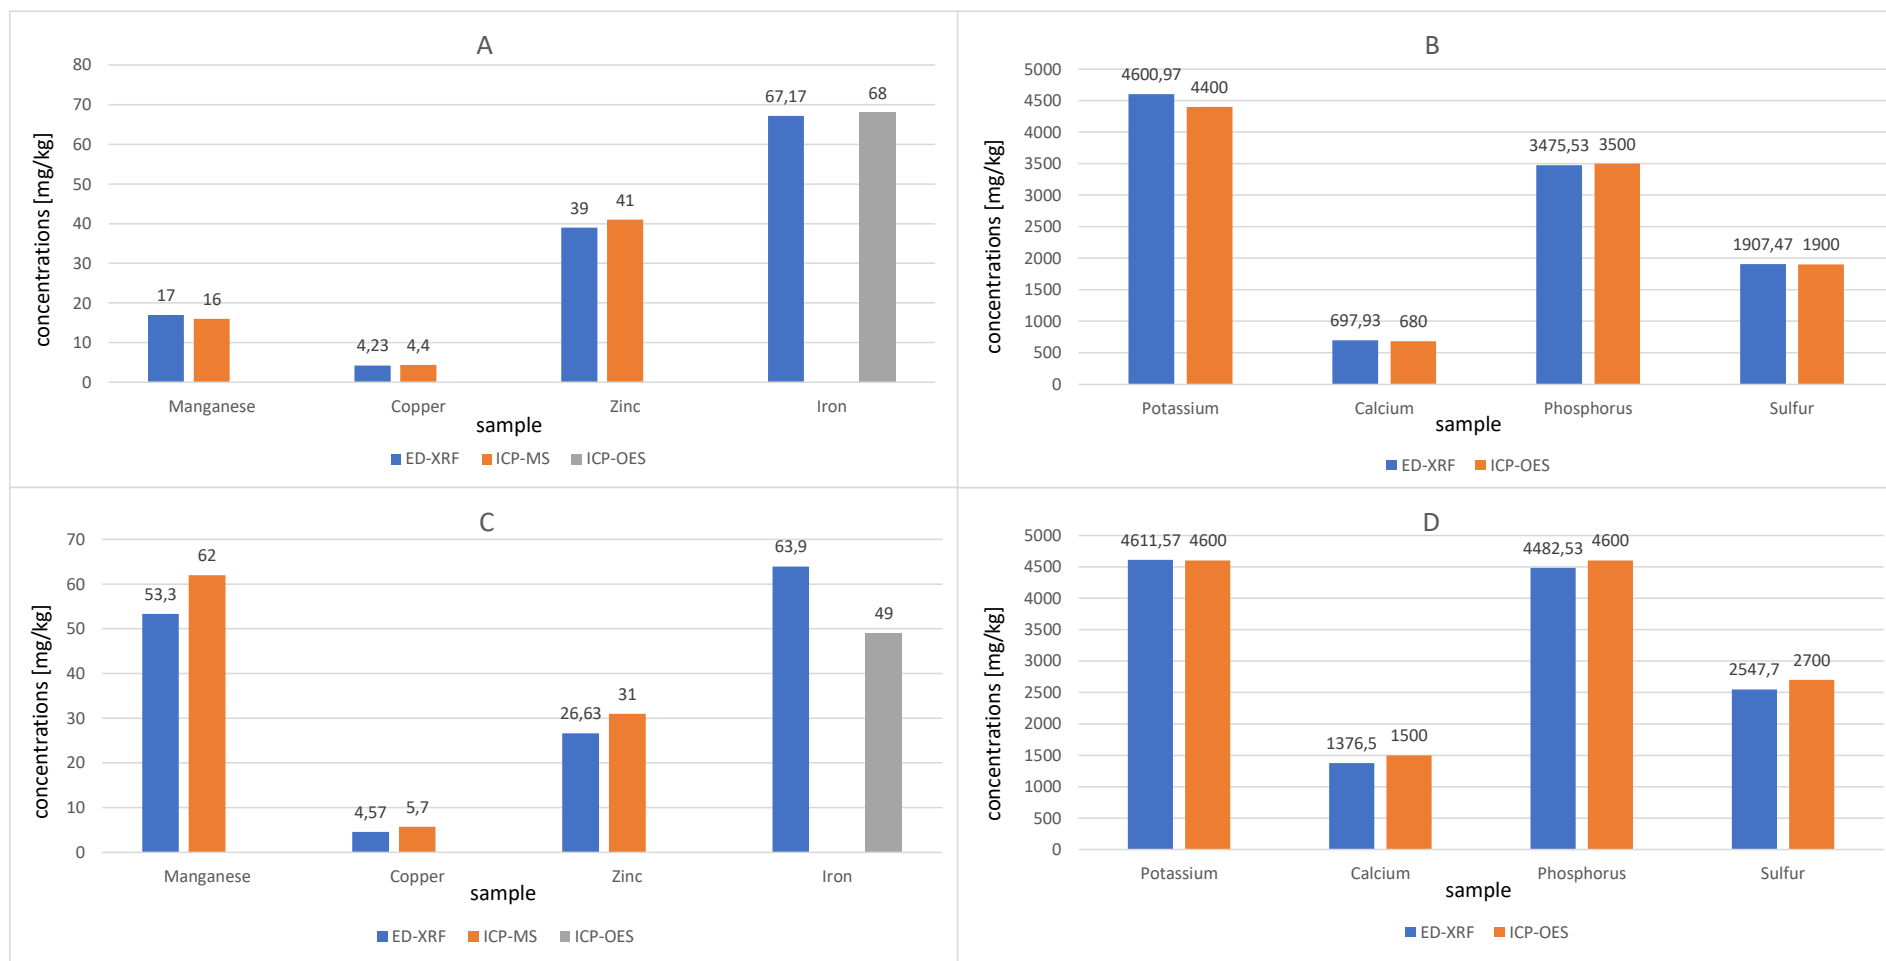

Figure S1: Comparison between results obtained by ICP-MS or ICP-OES and ED-XRF spectroscopy for sample P5 (Figure S1A,B) and P2 (Figure S1C,D).
