# Supplementary material for: Rapid and Accurate Approach for Honeybee Pollen Analysis Using ED-XRF and FTIR Spectroscopy
Source: MDPI journal article supplement (doi:10.3390/molecules26196024), 2021-10-04
Supplement: s1 [file s1]

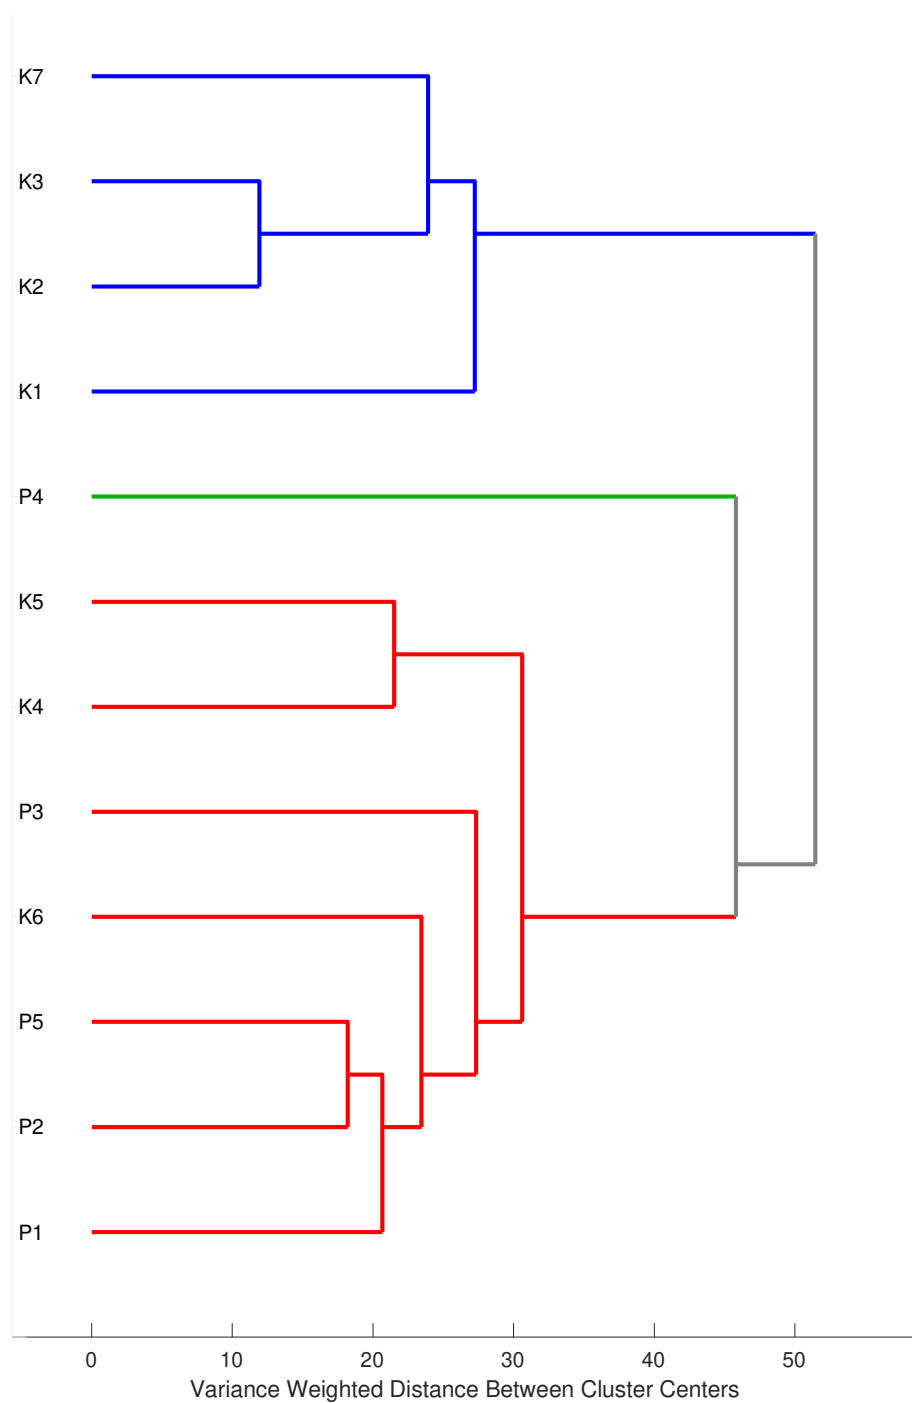

Figure S3: Dendrogram obtained by cluster analysis performed on the data from ATR-FTIR analysis for bee pollen samples K1-K7 and P1-P5.
