# Supplementary material for: Rapid and Accurate Approach for Honeybee Pollen Analysis Using ED-XRF and FTIR Spectroscopy
Source: MDPI journal article supplement (doi:10.3390/molecules26196024), 2021-10-04
Supplement: s1 [file s1]

**Table S7.** Detailed information about PCA analysis performed on the data from ED-XRF and ATR-FTIR (% Variance of the particular PC, % Variance cumulative, root mean squared error of calibration – RMSEC and root mean squared error of cross validation – RMSECV).

|     | ED-XRF                |                          |       |        | ATR-FTIR              |                          |       |        |
|-----|-----------------------|--------------------------|-------|--------|-----------------------|--------------------------|-------|--------|
|     | % Variance<br>this PC | % Variance<br>Cumulative | RMSEC | RMSECV | % Variance<br>this PC | % Variance<br>Cumulative | RMSEC | RMSECV |
| PC1 | 51.04                 | 51.04                    | 0.67  | 1.19   | 35.32                 | 35.32                    | 0.77  | 1.18   |
| PC2 | 22.69                 | 73.73                    | 0.49  | 1.34   | 23.85                 | 59.17                    | 0.61  | 1.16   |
| PC3 | 12.48                 | 86.21                    | 0.36  | 1.37   | 10.54                 | 69.71                    | 0.53  | 1.17   |
| PC4 | 6.13                  | 92.34                    | 0.26  | 1.81   | 8.40                  | 78.11                    | 0.45  | 1.19   |
