# Supplementary material for: Rapid and Accurate Approach for Honeybee Pollen Analysis Using ED-XRF and FTIR Spectroscopy
Source: Molecules. 2021 Oct 4;26(19):6024. doi: 10.3390/molecules26196024 (PMC8512728; doi:10.3390/molecules26196024)
Supplement: Supplementary file 1 [file molecules-26-06024-s001.zip]

Archive with 10 entries (10 files):
- Supp Mat. Figure S3.pdf
- Supp. Mat. Figure S1.pdf
- Supp. Mat. Figure S2.pdf
- Supplementary Materials Table S1.xlsx
- Supplementary Materials Table S2.xlsx
- Supplementary Materials Table S3.xlsx
- Supplementary Materials Table S4.xlsx
- Supplementary Materials Table S5.xlsx
- Supplementary Materials Table S6.pdf
- Supplementary Materials Table S7.pdf
