# Supplementary material for: Rapid and Accurate Approach for Honeybee Pollen Analysis Using ED-XRF and FTIR Spectroscopy
Source: Molecules. 2021 Oct 4;26(19):6024. doi: 10.3390/molecules26196024 (PMC8512728; doi:10.3390/molecules26196024)
Supplement: Supplementary file 1 [file molecules-26-06024-s001.zip › Supplementary Materials Table S1.xlsx]

## Sheet: FP standard sample (20.07.2019)
	Mineral	Method	Sample (date)	1st Repetition [mg/kg]	2nd Repetition [mg/kg]	3rd Repetition [mg/kg]	Mean [mg/kg]	SD [mg/kg]	RSD [%]	Method	Mean [mg/kg]	% error
	Manganese	ED-XRF Fundamental Parameter method with standard sample	2019-06-02	52.7	41.8	65.4	53.3	11.8114	22.1603	ICP-MS	62	-14.0323
	Copper			4.5	4.8	4.4	4.56667	0.208167	4.55839		5.7	-19.883
	Zinc			26.7	26.4	26.8	26.6333	0.208167	0.781602		31	-14.086
	Potassium			4886.8	4769.4	4178.5	4611.57	379.613	8.23175	ICP-OES	4600	0.251449
	Calcium			1280.3	1541.8	1307.4	1376.5	143.794	10.4463		1500	-8.23333
	Iron			66.3	62.1	63.3	63.9	2.16333	3.38549		49	30.4082
	Phosphorus			4563.4	4927.6	3956.6	4482.53	490.525	10.943		4600	-2.55362
	Sulfur			2544.4	2935	2163.7	2547.7	385.661	15.1376		2700	-5.64074
	Manganese	ED-XRF Fundamental Parameter method with standard sample	2019-07-20	17.4	17.4	16.2	17	0.69282	4.07541	ICP-MS	16	6.25
	Copper			3.8	4.6	4.3	4.23333	0.404145	9.54674		4.4	-3.78788
	Zinc			38.9	40.9	37.2	39	1.85203	4.74878		41	-4.87805
	Potassium			4524.1	4613.1	4665.7	4600.97	71.5755	1.55566	ICP-OES	4400	4.56742
	Calcium			688.1	680.3	725.4	697.933	24.1044	3.45369		680	2.63725
	Iron			73	70.7	57.8	67.1667	8.19288	12.1978		68	-1.22549
	Phosphorus			3614.7	3375.2	3436.7	3475.53	124.383	3.57881		3500	-0.699048
	Sulfur			1943.9	1858.1	1920.4	1907.47	44.3381	2.32445		1900	0.392982
	Manganese	ED-XRF Fundamental Parameter method with standard sample	2018-08-12	15.4	13.4	12.8	13.8667	1.36137	9.81759
	Copper			4.5	4.2	4.1	4.26667	0.208167	4.8789
	Zinc			22.5	22.6	17.7	20.9333	2.8006	13.3786
	Potassium			3272.3	3159.1	2945.6	3125.67	165.896	5.30755
	Calcium			1602.4	1445.1	1659.7	1569.07	111.115	7.08162
	Iron			162.6	153.1	165.3	160.333	6.40807	3.99672
	Phosphorus			2427.5	2267.6	2148.5	2281.2	139.996	6.13696
	Sulfur			1605.2	1351.9	1271.3	1409.47	174.235	12.3617
	Manganese	ED-XRF Fundamental Parameter method with standard sample	2019-06-14	21	23.8	25.4	23.4	2.22711	9.51755
	Copper			5.1	4.7	4.9	4.9	0.2	4.08163
	Zinc			32.2	30.3	35.2	32.5667	2.47049	7.58595
	Potassium			4223.9	4404.8	4559.4	4396.03	167.922	3.81985
	Calcium			977.9	1087.7	1140.1	1068.57	82.7754	7.7464
	Iron			70.1	65.9	71.1	69.0333	2.75923	3.99695
	Phosphorus			4094.7	4366.3	4501.7	4320.9	207.263	4.79676
	Sulfur			2120.4	2302.9	2253.2	2225.5	94.3506	4.23952
	Manganese	ED-XRF Fundamental Parameter method with standard sample	2019-06-29	18.6	19.7	23.1	20.4667	2.34592	11.4621
	Copper			4.5	4.9	4.6	4.66667	0.208167	4.46071
	Zinc			37.5	36.3	39.8	37.8667	1.77858	4.69694
	Potassium			3905.4	4296.6	4061	4087.67	196.959	4.81836
	Calcium			599.5	732.7	731.5	687.9	76.559	11.1294
	Iron			68.1	69.6	72.5	70.0667	2.23681	3.19241
	Phosphorus			3718.3	4093.8	3974.2	3928.77	191.829	4.88267
	Sulfur			2005.6	2181.4	2098.6	2095.2	87.9493	4.19766
