# Supplementary material for: Rapid and Accurate Approach for Honeybee Pollen Analysis Using ED-XRF and FTIR Spectroscopy
Source: Molecules. 2021 Oct 4;26(19):6024. doi: 10.3390/molecules26196024 (PMC8512728; doi:10.3390/molecules26196024)
Supplement: Supplementary file 1 [file molecules-26-06024-s001.zip › Supplementary Materials Table S2.xlsx]

## Sheet: Powder FP SS (20.07.2019)
	Mineral	Method	Sample (date)	1st Repetition [mg/kg]	2nd Repetition [mg/kg]	3rd Repetition [mg/kg]	Mean [mg/kg]	SD [mg/kg]	RSD [%]	Method	Mean [mg/kg]	% error
	Manganese	ED-XRF Fundamental Parameter method with standard sample	2019-06-02	40.8	44.3	45.8	43.6333	2.5658	5.88037	ICP-MS	62	-29.6237
	Copper			13.1	13.7	12.8	13.2	0.458258	3.47165		5.7	131.579
	Zinc			33.9	34.7	32.8	33.8	0.953939	2.82231		31	9.03226
	Potassium			5334.4	5517.6	5235.5	5362.5	143.134	2.66916	ICP-OES	4600	16.5761
	Calcium			1844.9	1904.1	1816.8	1855.27	44.5637	2.40201		1500	23.6844
	Iron			62.3	62.8	61.2	62.1	0.818535	1.31809		49	26.7347
	Phosphorus			4122	4232.4	3849.8	4068.07	196.92	4.84062		4600	-11.5638
	Sulfur			2121.8	2165.2	2004.6	2097.2	83.078	3.96138		2700	-22.3259
	Manganese	ED-XRF Fundamental Parameter method with standard sample	2019-07-20	17.7	17.6	17.7	17.6667	0.057735	0.326802	ICP-MS	16	10.4167
	Copper			11.6	10.8	9.8	10.7333	0.90185	8.40233		4.4	143.939
	Zinc			49	49.2	48.9	49.0333	0.152753	0.311528		41	19.5935
	Potassium			4289.4	4191	4281.1	4253.83	54.5733	1.28292	ICP-OES	4400	-3.32197
	Calcium			968.4	962.5	964.2	965.033	3.03699	0.314704		680	41.9167
	Iron			67.9	61.8	61.1	63.6	3.74032	5.88101		68	-6.47059
	Phosphorus			2795.3	2723.8	2832.9	2784	55.4208	1.99069		3500	-20.4571
	Sulfur			1464.6	1428.5	1494.3	1462.47	32.9518	2.25317		1900	-23.0281
	Manganese	ED-XRF Fundamental Parameter method with standard sample	2018-08-12	14	12.9	13.3	13.4	0.556776	4.15505
	Copper			11.2	9.5	10.2	10.3	0.8544	8.29515
	Zinc			28.4	28.6	28.2	28.4	0.2	0.704225
	Potassium			3217.7	3205.5	3222.6	3215.27	8.80587	0.273877
	Calcium			1932.8	1840.4	1931.2	1901.47	52.8913	2.78161
	Iron			110.4	108.5	114	110.967	2.79344	2.51737
	Phosphorus			1867.1	1772.4	1889.3	1842.93	62.084	3.36876
	Sulfur			1078.5	1036.4	1077.9	1064.27	24.1351	2.26777
	Manganese	ED-XRF Fundamental Parameter method with standard sample	2019-06-14	25.8	26.6	27.8	26.7333	1.00664	3.7655
	Copper			14.1	12.6	13	13.2333	0.776745	5.86961
	Zinc			47.3	43.9	47.1	46.1	1.90788	4.13856
	Potassium			5114.1	4767.8	5071.6	4984.5	188.867	3.78909
	Calcium			1461.5	1372.9	1461.17	1431.86	51.0591	3.56593
	Iron			71.5	68.8	72.2	70.8333	1.79536	2.53463
	Phosphorus			3994.2	3587.4	4003	3861.53	237.447	6.14904
	Sulfur			2018.7	1801	2014.3	1944.67	124.438	6.39896
	Manganese	ED-XRF Fundamental Parameter method with standard sample	2019-06-29	17.2	19.3	18.4	18.3	1.05357	5.75719
	Copper			10.7	10.3	9.7	10.2333	0.503322	4.91846
	Zinc			47.7	46.5	46.2	46.8	0.793725	1.69599
	Potassium			3903	3951.1	3905.6	3919.9	27.0512	0.6901
	Calcium			995.8	1019	1003.5	1006.1	11.8165	1.17449
	Iron			52	56.3	53.8	54.0333	2.15948	3.99656
	Phosphorus			2975.7	2961.3	2963.1	2966.7	7.84602	0.26447
	Sulfur			1539.5	1531.6	1517.9	1529.67	10.929	0.71447
