# Supplementary material for: Rapid and Accurate Approach for Honeybee Pollen Analysis Using ED-XRF and FTIR Spectroscopy
Source: Molecules. 2021 Oct 4;26(19):6024. doi: 10.3390/molecules26196024 (PMC8512728; doi:10.3390/molecules26196024)
Supplement: Supplementary file 1 [file molecules-26-06024-s001.zip › Supplementary Materials Table S3.xlsx]

## Sheet: Qual-Quantitative analysis
	Mineral	Method	Sample (date)	1st Repetition [mg/kg]	2nd Repetition [mg/kg]	3rd Repetition [mg/kg]	Mean [mg/kg]	SD [mg/kg]	RSD [%]	Method	Mean [mg/kg]	% error	Method	Mean [mg/kg]	% error
	Manganese	ED-XRF Qual-Quantitative analysis without standard sample	2019-06-02	43.2	38.5	29.2	36.9667	7.12484	19.2737	ED-XRF Fundamental Parameter method with standard sample	39.4333	-6.25528	ICP-MS	62	-40.3763
	Copper			8.3	8	7.9	8.06667	0.208167	2.58058		4.66667	72.8571		5.7	41.5205
	Zinc			30.3	29	21.2	26.8333	4.92172	18.3418		25.9333	3.47044		31	-13.4409
	Potassium			4419.9	3964.3	3961.2	4115.13	263.94	6.41389		4624.93	-11.0229	ICP-OES	4600	-10.5406
	Calcium			1012.2	1106.6	1275.4	1131.4	133.341	11.7855		1374.4	-17.6804		1500	-24.5733
	Iron			51.5	41.8	50.8	48.0333	5.40956	11.2621		65.1333	-26.2538		49	-1.97279
	Phosphorus			3106.7	3142.8	3008.2	3085.9	69.669	2.25766		4572.27	-32.5083		4600	-32.9152
	Sulfur			2192	2364.3	2637	2397.77	224.38	9.35786		2665.53	-10.0455		2700	-11.1938
	Chlorine			456.5	352.3	316.5	375.1	72.7316	19.3899		-	-
	Manganese	ED-XRF Qual-Quantitative analysis without standard sample	2019-07-20	13.3	16.9	16.9	15.7	2.07846	13.2386	ED-XRF Fundamental Parameter method with standard sample	17	-7.64706	ICP-MS	16	-1.875
	Copper			9.3	8.3	8.3	8.63333	0.57735	6.68745		4.23333	103.937		4.4	96.2121
	Zinc			49	48.3	48.3	48.5333	0.404145	0.832717		39	24.4444		41	18.374
	Potassium			4114.8	4162	4162	4146.27	27.2509	0.65724		4600.97	-9.88271	ICP-OES	4400	-5.76667
	Calcium			592	616.4	616.4	608.267	14.0873	2.31598		697.933	-12.8475		680	-10.549
	Iron			57.7	66	66	63.2333	4.79201	7.57829		67.1667	-5.85608		68	-7.0098
	Phosphorus			2643.6	2504.8	2504.8	2551.07	80.1362	3.14128		3475.53	-26.5993		3500	-27.1124
	Sulfur			1896.1	1924.8	1924.8	1915.23	16.57	0.865166		1907.47	0.407172		1900	0.801754
	Bromine			22.2	17.3	17.7	19.0667	2.72091	14.2705		-	-
	Chlorine			592.7	626.3	626.3	615.1	19.399	3.15379		-	-
	Manganese	ED-XRF Qual-Quantitative analysis without standard sample	2018-08-12	12	11.8	10.1	11.3	1.04403	9.23921	ED-XRF Fundamental Parameter method with standard sample	13.8667	-18.5096
	Copper			7	9.5	8.6	8.36667	1.26623	15.1342		4.26667	96.0938
	Zinc			28.2	25	26.5	26.5667	1.60104	6.0265		20.9333	26.9108
	Potassium			3032.7	3030.8	2680	2914.5	203.085	6.9681		3125.67	-6.75589
	Calcium			1557.3	1918.2	1460.8	1645.43	241.1	14.6527		1569.07	4.86701
	Iron			122.9	147.1	94.3	121.433	26.4305	21.7655		160.333	-24.262
	Phosphorus			1417.4	1433.8	1233.2	1361.47	111.384	8.18121		2281.2	-40.318
	Sulfur			1379.7	1579.3	1240.9	1399.97	170.108	12.1509		1409.47	-0.674014
	Chlorine			728.1	803.4	627.9	719.8	88.0439	12.2317		-	-
	Silicone			293.7	426.1	269.1	329.633	84.4432	25.6173		-	-
	Manganese	ED-XRF Qual-Quantitative analysis without standard sample	2019-06-14	27.6	21.8	18.3	22.5667	4.69716	20.8146	ED-XRF Fundamental Parameter method with standard sample	23.4	-3.56125
	Copper			10.3	10.8	9.6	10.2333	0.602771	5.89027		4.9	108.844
	Zinc			43.6	44.2	44.2	44	0.34641	0.787296		32.5667	35.1075
	Potassium			4358	4339.9	4020.2	4239.37	190.02	4.48226		4396.03	-3.56382
	Calcium			907.5	856.2	909.1	890.933	30.0906	3.37742		1068.57	-16.6235
	Iron			59.9	54.7	62.7	59.1	4.05956	6.86896		69.0333	-14.3892
	Phosphorus			3150.9	3101.2	2836.5	3029.53	169.009	5.5787		4320.9	-29.8865
	Sulfur			2290.8	2431	2370	2363.93	70.2966	2.97371		2225.5	6.22033
	Chlorine			509.5	509.7	505.6	508.267	2.31157	0.454794		-	-
	Manganese	ED-XRF Qual-Quantitative analysis without standard sample	2019-06-29	18.4	17	17	17.4667	0.80829	4.62762	ED-XRF Fundamental Parameter method with standard sample	20.4667	-14.658
	Copper			9.8	9.2	9.1	9.36667	0.378594	4.04193		4.66667	100.714
	Zinc			46.6	46.6	46.3	46.5	0.173205	0.372484		37.8667	22.7993
	Potassium			2898.3	2711.9	2787.9	2799.37	93.7275	3.34817		4087.67	-31.5168
	Calcium			681.2	753	627.1	687.1	63.157	9.19182		687.9	-0.116296
	Iron			54.2	50.1	47.1	50.4667	3.56417	7.06243		70.0667	-27.9734
	Phosphorus			2710	2790	2900	2800	95.3939	3.40693		3928.77	-28.7308
	Sulfur			2103.9	1952.4	2133.3	2063.2	97.0751	4.70507		2095.2	-1.5273
	Chlorine			459.4	476.7	429	455.033	24.1479	5.30685		-	-
