# Supplementary material for: Rapid and Accurate Approach for Honeybee Pollen Analysis Using ED-XRF and FTIR Spectroscopy
Source: Molecules. 2021 Oct 4;26(19):6024. doi: 10.3390/molecules26196024 (PMC8512728; doi:10.3390/molecules26196024)
Supplement: Supplementary file 1 [file molecules-26-06024-s001.zip › Supplementary Materials Table S4.xlsx]

## Sheet: Powder q-q analysis
	Mineral	Method	Sample (date)	1st Repetition [mg/kg]	2nd Repetition [mg/kg]	3rd Repetition [mg/kg]	Mean [mg/kg]	SD [mg/kg]	RSD [%]	Method	Mean [mg/kg]	% error	Method	Mean [mg/kg]	% error
	Manganese	ED-XRF Qual-Quantitative analysis without standard sample	2019-06-02	45.4	45.3	46.4	45.7	0.608276	1.33102	ED-XRF Fundamental Parameter method with standard sample	43.6333	4.73644	ICP-MS	62	-26.2903
	Copper			12.7	11.9	10.9	11.8333	0.90185	7.62127		13.2	-10.3535		5.7	107.602
	Zinc			35.9	36.7	36.9	36.5	0.52915	1.44973		33.8	7.98817		31	17.7419
	Potassium			6198.1	6252.8	6138.7	6196.53	57.0661	0.920936		5362.5	15.5531	ICP-OES	4600	34.7072
	Calcium			1729	1748.5	1732.7	1736.73	10.3568	0.596338		1855.27	-6.38902		1500	15.7822
	Iron			62.5	57.5	62.5	60.8333	2.88675	4.74534		62.1	-2.03972		49	24.1497
	Phosphorus			4510.2	4738.8	4586.2	4611.73	116.419	2.52442		4068.07	13.3643		4600	0.255072
	Sulfur			3206	3249	3134.2	3196.4	57.999	1.81451		2097.2	52.4127		2700	18.3852
	Chlorine			469.2	477.6	448.3	465.033	15.0879	3.24447		-	-
	Manganese	ED-XRF Qual-Quantitative analysis without standard sample	2019-07-20	16.6	16.4	16.6	16.5333	0.11547	0.698408	ED-XRF Fundamental Parameter method with standard sample	17.6667	-6.41509	ICP-MS	16	3.33333
	Copper			11.3	12.5	9.7	11.1667	1.40475	12.5799		10.7333	4.03727		4.4	153.788
	Zinc			45.7	51.4	50.1	49.0667	2.98719	6.08803		49.0333	0.067981		41	19.6748
	Potassium			4712.3	5003.1	4880.8	4865.4	146.01	3.00099		4253.83	14.3768	ICP-OES	4400	10.5773
	Calcium			799.9	879.9	835	838.267	40.0999	4.78367		965.033	-13.136		680	23.2745
	Iron			62.1	66.3	62.8	63.7333	2.25019	3.53063		63.6	0.209644		68	-6.27451
	Phosphorus			2845.4	3104.4	3033.8	2994.53	133.89	4.47116		2784	7.56226		3500	-14.4419
	Sulfur			2248	2270.7	2186.6	2235.1	43.5087	1.94661		1462.47	52.8308		1900	17.6368
	Bromine			22.2	17.3	17.7	19.0667	2.72091	14.2705		-	-
	Chlorine			697.5	705.2	678.8	693.833	13.5766	1.95675		-	-
	Manganese	ED-XRF Qual-Quantitative analysis without standard sample	2018-08-12	11.3	12.2	12.7	12.0667	0.70946	5.8795	ED-XRF Fundamental Parameter method with standard sample	13.4	-9.95025
	Copper			10	10	10.2	10.0667	0.11547	1.14705		10.3	-2.26537
	Zinc			27.8	26.7	27.3	27.2667	0.550757	2.01989		28.4	-3.99061
	Potassium			3571.8	3597.2	3608.4	3592.47	18.7535	0.522023		3215.27	11.7315
	Calcium			1911	1921.2	1901.5	1911.23	9.85207	0.515482		1901.47	0.513639
	Iron			114.1	118.5	120.8	117.8	3.40441	2.88999		110.967	6.15801
	Phosphorus			1472.5	1524.5	1551.4	1516.13	40.1099	2.64554		1842.93	-17.7326
	Sulfur			1627.5	1600.6	1596	1608.03	17.0148	1.05811		1064.27	51.0931
	Chlorine			793.2	846.5	840.3	826.667	29.1483	3.526		-	-
	Silicone			445	445.9	438.3	443.067	4.15251	0.93722		-	-
	Manganese	ED-XRF Qual-Quantitative analysis without standard sample	2019-06-14	26.7	23.7	25.7	25.3667	1.52753	6.02178	ED-XRF Fundamental Parameter method with standard sample	26.7333	-5.11222
	Copper			12.3	10.1	13	11.8	1.51327	12.8244		13.2333	-10.8312
	Zinc			45.7	40.1	45.9	43.9	3.29242	7.49981		46.1	-4.77223
	Potassium			5336.7	4764.1	5474.9	5191.9	376.875	7.25889		4984.5	4.1609
	Calcium			1183.3	1069.3	1253.5	1168.7	92.9639	7.95447		1431.86	-18.3788
	Iron			70.5	59.7	67	65.7333	5.51029	8.3828		70.8333	-7.2
	Phosphorus			3677.7	3173	3881.8	3577.5	364.869	10.199		3861.53	-7.35545
	Sulfur			2600.7	2300.6	2659	2520.1	192.315	7.63123		1944.67	29.5903
	Bromine			1	1	1	1	0	0		-	-
	Chlorine			620	536.6	690.6	615.733	77.0886	12.5198		-	-
	Manganese	ED-XRF Qual-Quantitative analysis without standard sample	2019-06-29	20	20.8	18.2	19.6667	1.33167	6.77118	ED-XRF Fundamental Parameter method with standard sample	18.3	7.46812
	Copper			9.9	11.1	10.2	10.4	0.6245	6.00481		10.2333	1.62866
	Zinc			48.1	50.3	47.8	48.7333	1.36504	2.80104		46.8	4.13105
	Potassium			4517	4703.3	4479.5	4566.6	119.861	2.62474		3919.9	16.4979
	Calcium			886.9	910	885.5	894.133	13.7588	1.53878		1006.1	-11.1288
	Iron			53.7	52.8	51.9	52.8	0.9	1.70455		54.0333	-2.28254
	Phosphorus			3159.8	3076.1	3026.1	3087.33	67.5542	2.18811		2966.7	4.06625
	Sulfur			2332.1	2415	2357.9	2368.33	42.4234	1.79128		1529.67	54.8268
	Chlorine			536.3	598.5	532.4	555.733	37.0883	6.67376		-	-
