# Supplementary material for: Rapid and Accurate Approach for Honeybee Pollen Analysis Using ED-XRF and FTIR Spectroscopy
Source: Molecules. 2021 Oct 4;26(19):6024. doi: 10.3390/molecules26196024 (PMC8512728; doi:10.3390/molecules26196024)
Supplement: Supplementary file 1 [file molecules-26-06024-s001.zip › Supplementary Materials Table S5.xlsx]

## Sheet: FP with standard sample
		Mineral	Method	Sample	1st Repetition [mg/kg]	2nd Repetition [mg/kg]	3rd Repetition [mg/kg]	Mean [mg/kg]	SD [mg/kg]	RSD [%]	Method	Mean [mg/kg]	% error
		Manganese	ED-XRF Fundamental Parameter method with standard sample	K3	23.6	20.5	23.7	22.6	1.81934	8.05018	content declared by the manufacturer	22	2.72727
		Copper			4.9	5	5.1	5	0.1	2		7	-28.5714
		Zinc			29.2	30.2	34.1	31.1667	2.58908	8.30721		24	29.8611
		Potassium			5448.5	5591	6501.9	5847.13	571.503	9.77408		8099	-27.8043
		Calcium			1733.6	1823.6	2016.8	1858	144.7	7.78794		2073	-10.3714
		Iron			65.7	68	69.5	67.7333	1.91398	2.82576		73	-7.21461
		Phosphorus			5709.8	5932.8	6753.2	6131.93	549.465	8.96071		-	-
		Sulfur			3029.4	3098.8	3496.4	3208.2	251.989	7.85453		-	-
		Manganese	ED-XRF Fundamental Parameter method with standard sample	K5	18.3	18.9	19.4	18.8667	0.550757	2.91921	content declared by the manufacturer	90	-79.037
		Copper			5.3	6	5.5	5.6	0.360555	6.43848		12	-53.3333
		Zinc			30.9	29.3	29.7	29.9667	0.832666	2.77864		48	-37.5694
		Potassium			4551	5182.8	4844.5	4859.43	316.165	6.5062		4010	21.1829
		Calcium			1272.2	1465.7	1298.4	1345.43	104.975	7.80229		1640	-17.9614
		Iron			85.8	80.2	84.1	83.3667	2.87112	3.44397		100	-16.6333
		Phosphorus			3770.3	4239.1	3886.4	3965.27	244.148	6.15717		5150	-23.0045
		Sulfur			2033.6	2084.3	2056	2057.97	25.4072	1.23458		-	-
		Manganese	ED-XRF Fundamental Parameter method with standard sample	K1	25.5	25.9	25.5	25.6333	0.23094	0.900937
		Copper			5.7	6.9	7.3	6.63333	0.832666	12.5528
		Zinc			39.9	48	42.4	43.4333	4.14769	9.54956
		Potassium			4930.6	5997.9	4834.8	5254.43	645.64	12.2875
		Calcium			1327.7	1370.5	1510.5	1402.9	95.61	6.81517
		Iron			97.7	83	95.5	92.0667	7.92864	8.61185
		Phosphorus			4760.1	5631.4	4636.7	5009.4	542.19	10.8234
		Sulfur			2513.1	2823.2	2432.2	2589.5	206.393	7.97037
		Manganese	ED-XRF Fundamental Parameter method with standard sample	K2	49.6	38.2	25.1	37.6333	12.2598	32.577
		Copper			5.5	5.9	5.6	5.66667	0.208167	3.67353
		Zinc			37.2	36.1	34.4	35.9	1.41067	3.92945
		Potassium			4647.4	5097.9	4668.5	4804.6	254.224	5.29127
		Calcium			1083	1281.6	1067.8	1144.13	119.292	10.4264
		Iron			71	71.9	58.4	67.1	7.54785	11.2487
		Phosphorus			3963.5	4699.4	4083.4	4248.77	394.838	9.293
		Sulfur			2126.6	2471	2106.6	2234.73	204.857	9.16696
		Manganese	ED-XRF Fundamental Parameter method with standard sample	K4	32.3	30.9	30.3	31.1667	1.02632	3.29301
		Copper			5.4	5.9	5	5.43333	0.450925	8.29923
		Zinc			33.3	32.9	31.8	32.6667	0.776745	2.37779
		Potassium			7425.1	6624	7205.2	7084.77	413.906	5.8422
		Calcium			1231.8	1393.6	1392.5	1339.3	93.0994	6.95134
		Iron			134.1	122.7	120.6	125.8	7.2643	5.77448
		Phosphorus			5574.7	5196.3	5475.6	5415.53	196.221	3.6233
		Sulfur			2572.7	2435.1	2683.3	2563.7	124.345	4.8502
		Manganese	ED-XRF Fundamental Parameter method with standard sample	K6	18.1	16.9	17.9	17.6333	0.64291	3.64599
		Copper			5.1	5.2	5.5	5.26667	0.208167	3.95253
		Zinc			32.3	34	33.6	33.3	0.888819	2.66913
		Potassium			4039.7	4212.2	3757.4	4003.1	229.598	5.73552
		Calcium			1486	1375.4	1218.1	1359.83	134.627	9.90023
		Iron			86.7	93.6	65.4	81.9	14.7	17.9487
		Phosphorus			3657.7	3888.9	3581	3709.2	160.28	4.32116
		Sulfur			2248	2360.5	2218.3	2275.6	75.0102	3.29628
		Manganese	ED-XRF Fundamental Parameter method with standard sample	K7	48.7	41.6	30.1	40.1333	9.38634	23.3879
		Copper			5.8	6.3	5.1	5.73333	0.602771	10.5135
		Zinc			37.4	36	32.2	35.2	2.69072	7.6441
		Potassium			5255.9	5518.9	5453.9	5409.57	136.99	2.53237
		Calcium			1437.2	1502.8	1393.7	1444.57	54.9218	3.80196
		Iron			86.6	94.2	81.4	87.4	6.43739	7.36544
		Phosphorus			5332.1	5471.6	5276.5	5360.07	100.512	1.8752
		Sulfur			2698.3	2947.6	3001.1	2882.33	161.607	5.60681
